# Supplementary material
Source: PubMed Central journal article supplement (PMC3106434)
Supplement: supp_bgr040_Supplemental_Material.pdf [file supp_bgr040_Supplemental_Material.pdf]

**Supplementary Table 1.** Induction of different classes of genes by DIM-C-pPhOCH<sub>3</sub> in L3.6pl cells using the Amersham Biosciences CodeLink human whole genome array.

| Description                                                                                                        | Genbank   | Relative expression |          |
|--------------------------------------------------------------------------------------------------------------------|-----------|---------------------|----------|
|                                                                                                                    |           | 2 h/DMSO            | 6 h/DMSO |
| <b>Metabolism/homeostasis</b>                                                                                      |           |                     |          |
| <i>Asparagine synthase; ASNS</i>                                                                                   | NM_001673 | 3.12                | 4.10     |
| <i>Dehydrogenase/reductase (SDR family) member 9; DHRS9</i>                                                        | NM_005771 | 1.49                | 4.83     |
| <i>DIP2 disco-interacting protein 2 homolog C; DIP2C</i>                                                           | BF726674  | 5.36                | 2.46     |
| <i>Glutamine-fructose-6-phosphate transaminase 1; GFPT1</i>                                                        | NM_002056 | 0.91                | 2.58     |
| <i>Heme oxygenase (decycling); HMOX1</i>                                                                           | NM_002133 | 1.41                | 2.87     |
| <i>Homocysteine-inducible, endoplasmic reticulum stress-inducible, ubiquitin-like domain member 1; HERPUD1</i>     | NM_014685 | 1.40                | 5.09     |
| <i>Hyaluronan synthase 3; HAS3</i>                                                                                 | NM_005329 | 3.03                | 2.57     |
| <i>Insulin induced gene 1; INSIG1</i>                                                                              | NM_198336 | 2.07                | 2.60     |
| <i>3-Ketodihydrosphingosine reductase; KDSR</i>                                                                    | BQ279242  | 2.93                | 4.17     |
| <i>Methylene tetrahydrofolate dehydrogenase (NAD+- dependent), methenyltetrahydrofolate cyclohydrolase; MTHFD2</i> | NM_006636 | 1.33                | 2.64     |
| <i>Ornithine decarboxylase 1; ODC1</i>                                                                             | NM_002539 | 2.21                | 2.96     |
| <i>Prostaglandin-endoperoxide synthase 2 (prostaglandin G/H synthase and cyclooxygenase); PTGS2</i>                | NM_000963 | 4.22                | 6.38     |
| <i>TCDD-inducible poly(ADP-ribose) polymerase; TIPARP</i>                                                          | NM_015508 | 3.36                | 1.88     |
| <i>Thioredoxin reductase 1</i>                                                                                     | NM_003330 | 3.43                | 4.18     |
| <i>Very low density lipoprotein receptor; VLDLR</i>                                                                | NM_003383 | 1.06                | 2.88     |
| <b>Signal transduction</b>                                                                                         |           |                     |          |
| <i>ADP-ribosylation factor-like 5B; ARL5B</i>                                                                      | NM_178815 | 2.85                | 1.62     |
| <i>Adrenomedullin 2; ADM2</i>                                                                                      | NM_024866 | 0.93                | 3.22     |
| <i>Amphiregulin; AREG</i>                                                                                          | NM_001657 | 3.01                | 3.68     |
| <i>Cholinergic receptor, muscarinic 2; CHRM2</i>                                                                   | A1221812  | 1.32                | 3.33     |
| <i>Connective tissue growth factor; CTGF</i>                                                                       | NM_001901 | 6.64                | 0.62     |
| <i>Diphtheria toxin receptor (heparin-binding epidermal growth factor-like growth factor); HBEGF</i>               | NM_001945 | 3.46                | 6.03     |
| <i>Epiregulin; EREG</i>                                                                                            | NM_001432 | 3.06                | 3.5      |
| <i>Forkhead box C2 (MFH-1, mesenchyme forkhead 1); FOXC2</i>                                                       | BF589934  | 2.62                | 1.36     |
| <i>GTP binding protein overexpressed in skeletal muscle; GEM</i>                                                   | NM_005261 | 7.1                 | 1.17     |
| <i>Inhibin, beta A; INHBA</i>                                                                                      | NM_002192 | 2.77                | 2.70     |
| <i>Interleukin 11; IL11</i>                                                                                        | NM_000641 | 3.19                | 2.59     |
| <i>Jun oncogene; JUN</i>                                                                                           | NM_002228 | 3.78                | 2.27     |
| <i>Mitogen-activated protein kinase kinase kinase 8; MAP3K8</i>                                                    | NM_005204 | 3.21                | 1.31     |
| <i>Plasminogen activator, urokinase; PLAU</i>                                                                      | NM_002658 | 2.69                | 2.91     |
| <i>Plasminogen activator, urokinase receptor; PLAUR</i>                                                            | NM_002659 | 3.10                | 2.81     |
| <i>Protein tyrosine phosphatase, receptor type, E; PTPRE</i>                                                       | NM_006504 | 2.31                | 4.51     |
| <i>Ras, dexamethasone-induced 1; RASD1</i>                                                                         | NM_016084 | 5.32                | 3.32     |
| <i>Rho GTPase activating protein 15; ARHGAP15</i>                                                                  | NM_018460 | 2.92                | 1.7      |
| <i>Stanniocalcin 2; STC2</i>                                                                                       | NM_003714 | 2.06                | 4.73     |
| <i>Transmembrane protein 2; TMEM2</i>                                                                              | NM_013390 | 4.24                | 2.53     |
| <i>Tribbles homolog 1; TRIB1</i>                                                                                   | NM_025195 | 4.57                | 3.9      |
| <i>Wingless-type MMTV integration site family member 9A; WNT9A</i>                                                 | BF222744  | 4.43                | 3.31     |

| Description                                                                              | Genbank   | Relative expression |          |
|------------------------------------------------------------------------------------------|-----------|---------------------|----------|
|                                                                                          |           | 2 h/DMSO            | 6 h/DMSO |
| <b>Transcription</b>                                                                     |           |                     |          |
| <i>Cysteine-serine-rich nuclear protein 1; CSRNP1</i>                                    | NM_033027 | 3.72                | 2.32     |
| <i>E2F transcription factor 7; E2F7</i>                                                  | BG033282  | 2.98                | 2.75     |
| <i>FOS-like antigen 1; FOSL1</i>                                                         | NM_005438 | 3.22                | 1.87     |
| <i>Iroquois homeobox protein 5; IRX5</i>                                                 | NM_005853 | 2.71                | 1.12     |
| <i>MAX dimerization protein 1</i>                                                        | NM_002357 | 1.97                | 3.15     |
| <i>Nuclear factor of activated T-cells, cytoplasmic, calcineurin-dependent 2; NFATC2</i> | AU185751  | 2.80                | 1.50     |
| <i>S100 calcium binding protein A1; S100A1</i>                                           | NM_006271 | 3.38                | 3.19     |
| <i>SERTA domain containing 1; SERTAD1</i>                                                | NM_013376 | 4.13                | 1.37     |
| <i>X-box binding protein 1; XBP1</i>                                                     | NM_005080 | 1.58                | 2.78     |
| <b>Stress</b>                                                                            |           |                     |          |
| <i>ERBB receptor feedback inhibitor 1; ERRF1</i>                                         | NM_018948 | 2.64                | 3.09     |
| <i>Protein phosphatase 1, regulatory (inhibitor) subunit 15A; PPP1R15A</i>               | NM_014330 | 2.88                | 2.34     |
| <i>V-maf musculoaponeurotic fibrosarcoma oncogene homolog 1 (avian); MAFF</i>            | NM_012323 | 3.28                | 1.2      |
| <b>Transport</b>                                                                         |           |                     |          |
| <i>Basic helix-loop-helix family, member a15; BHLHA15</i>                                | AA367338  | 0.94                | 5.09     |
| <i>Casein alpha s1; CSN1S1</i>                                                           | NM_001890 | 2.80                | 2.93     |
| <i>Neuronal pentraxin 1; NPTX1</i>                                                       | NM_002522 | 6.10                | 6.10     |
| <i>Solute carrier family 30 (zinc transporter), member 1; SLC30A1</i>                    | NM_021194 | 1.85                | 2.65     |
| <i>Sorting nexin 9; SNX9</i>                                                             | NM_016224 | 2.16                | 3.14     |
| <i>Syntaxin 11; STX11</i>                                                                | NM_003764 | 4.96                | 2.61     |
| <b>Immune response</b>                                                                   |           |                     |          |
| <i>Chemokine (C-X-C motif) ligand 2; CXCL2</i>                                           | NM_002089 | 3.07                | 2.45     |
| <i>Colony stimulating factor 2 (granulocyte-macrophage); CSF2</i>                        | NM_000758 | 1.67                | 2.56     |
| <i>Interleukin 1, alpha; IL1A</i>                                                        | NM_000575 | 1.75                | 3.57     |
| <i>Secreted and transmembrane 1; SECTM1</i>                                              | NM_003004 | 3.69                | 3.04     |
| <i>V-ets erythroblastosis virus E26 oncogene homolog 1 (avian); ETS 1</i>                | NM_005238 | 3.09                | 1.55     |
| <b>Others</b>                                                                            |           |                     |          |
| <i>Angiomotin like 2; AMOTL2</i>                                                         | NM_016201 | 3.72                | 1.48     |
| <i>Claudin 4; CLDN4</i>                                                                  | NM_001305 | 2.83                | 1.46     |
| <i>Endothelial cell-specific molecule 1; ESM1</i>                                        | NM_007036 | 3.12                | 3.66     |
| <i>Cytochrome P450, family 1, subfamily B, polypeptide 1; CYP1B1</i>                     | NM_000104 | 4.36                | 3.03     |
| <i>DnaJ (Hsp40) homolog, subfamily B, member 1; DNAJB1</i>                               | NM_006145 | 2.73                | 1.27     |
| <i>DnaJ (Hsp40) homolog, subfamily B, member 9; DNAJB9</i>                               | NM_012328 | 1.81                | 5.48     |
| <i>Interferon stimulated gene 20kDa; ISG20</i>                                           | NM_002201 | 1.25                | 2.65     |
| <i>Interleukin 13 receptor, alpha 2; IL13RA2</i>                                         | NM_000640 | 1.15                | 4.80     |
| <i>Matrix metalloproteinase 3 (stromelysin 1, progelatinase); MMP3</i>                   | NM_002422 | 1.46                | 4.58     |
| <i>N-myc downstream regulated gene 1; NDRG1</i>                                          | NM_006096 | 3.11                | 3.67     |

## Supplementary Figure 1

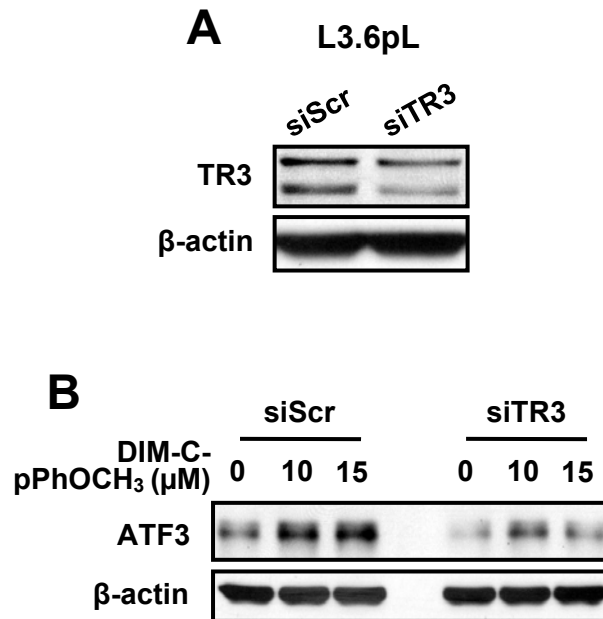

**Supplemental Figure 1.** TR3-dependent induction of ATF3 by DIM-C-pPhOCH<sub>3</sub> in L3.6pL cells. (A) and (B) L3.6pL cells were transfected with either siScr or siTR3, and treated with different concentrations of DIM-C-pPhCH<sub>3</sub> for 6 hr. Whole cell lysates were analyzed by western blot analysis, and  $\beta$ -actin was used as a loading control.

## Supplementary Figure 2

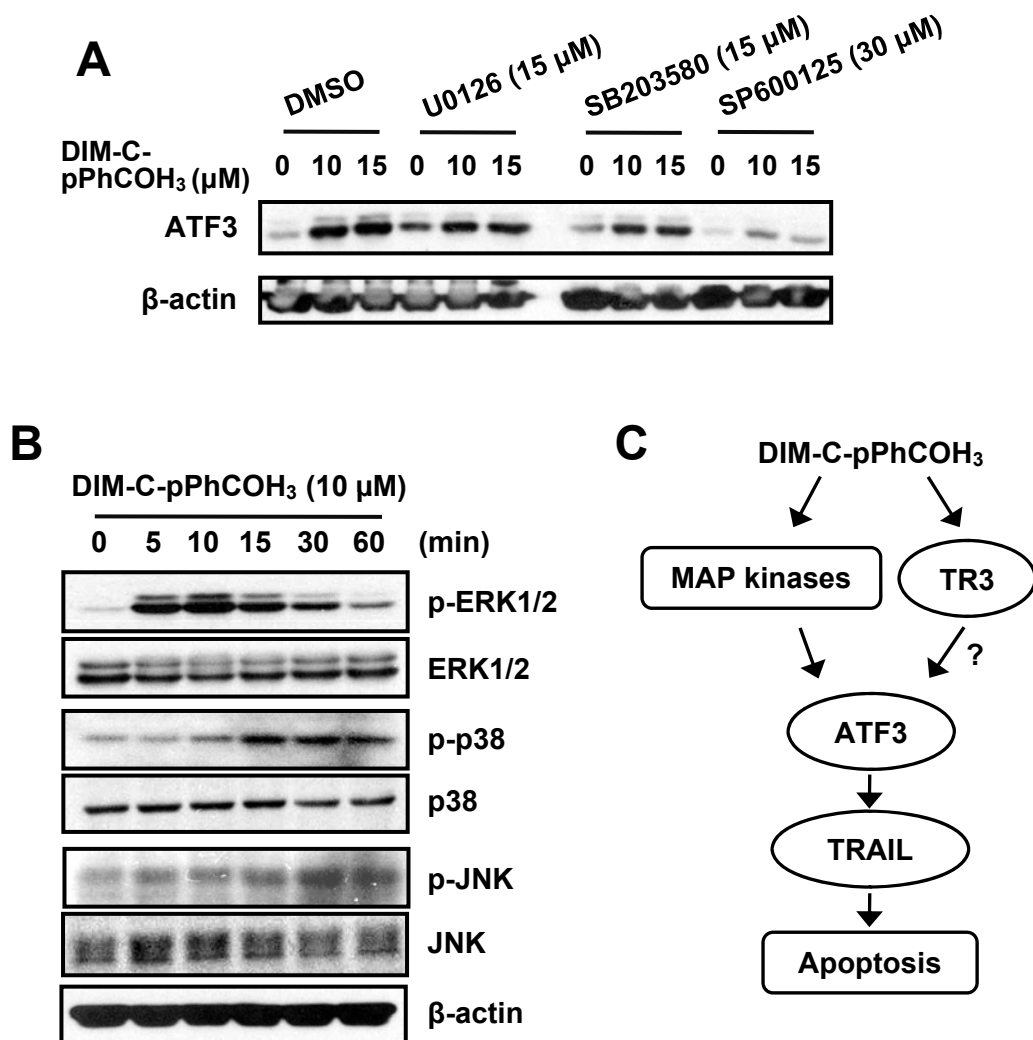

**Supplemental Figure 2.** TR3-independent induction of ATF3 by DIM-C-pPhOCH<sub>3</sub> through MAP kinase pathways. (A) Panc1 cells were pretreated with each MAP kinase inhibitor for 1 hr, and cells were then treated with DIM-C-pPhOCH<sub>3</sub> for 6 hr. (B) Panc1 cells were treated with DIM-C-pPhCH<sub>3</sub>, and the cells were harvested at the indicated time points. Whole cell lysates were analyzed by western blot analysis, and β-actin was used as a loading control. (C) Schematic diagram summarizing DIM-C-pPhOCH<sub>3</sub>-induced apoptosis through TR3-dependent and -independent induction of ATF3 in human pancreatic cancer cells.
